# Supplementary material
Source: bioRxiv or medRxiv preprint supplement (https://www.biorxiv.org/highwire/filestream/80922/field_highwire_adjunct_files/0/264291-1.pdf)

## Legends for supplementary figures

**Figure S1. Bioinformatics analyses of *T. gondii* AKMT.** (A) Folding predictions of full-length *T. gondii* AKMT obtained using the FoldIndex algorithm [1] suggested that its N-terminal ~300 amino acids are completely disordered and the rest of the protein is mostly folded. (B) Domain arrangement of AKMT and primary sequence alignment of AKMT with orthologs from various apicomplexan species and free-living relatives (*Chromera* and *Vitrolla*) in the superphylum of Alveolata, together with mammalian SMYD1-3. Domains and domain boundaries in AKMT are indicated above the aligned sequences. The MYND domains in SYMD1-3 are indicated by a red box. The alignments were carried using the option of “Mafft with defaults” in Jalview, with residues highlighted using the Clustal color scheme.

**Figure S2. Secondary structure assignments of the AKMT crystal structure.** The secondary structures were calculated using PDBsum [2], with all  $\alpha$ -helices and  $\beta$ -strands sequentially numbered.

**Figure S3. Methylated lysine residues in the crystal structure.** (A) Table listing all lysine residues of the four AKMT molecules in the asymmetric unit. Unmodified, mono-methyl, and di-methyl lysines are highlighted in blue, magenta, and green colors, respectively. Marked with asterisks are the mono-methyl lysines adopting two different conformations in the structure. Arrows mark the representative residues shown in (B). (B) 2Fo-Fc maps (contoured at 1.0  $\sigma$ ) of the representative lysine residues that are well-resolved in the refined structure. The same residues in all four molecules of the asymmetric unit are shown side-by-side for direct comparisons. (C) 2Fo-Fc maps (contoured at 1.2  $\sigma$ ) for the representative small molecules of each type present in the refined model, including one glycerol (GOL), one di(hydroxyethyl)ether (PEG), and three ethylene glycols (EDO).

**Figure S4. Intermolecular contacts between neighboring molecules in the asymmetric unit of the crystal.** Buried surface areas and numbers of hydrogen bonds and salt bridges for each intermolecular contact site are shown around the structure. Details of the hydrogen bonds in each case are also listed. The analyses were carried out on the PDBePISA server [3].

**Figure S5. Comparison of AKMT with SAM-bound SMYD2.** (A) Superposition of AKMT chain A (rainbow color), together with the swapped N-terminus of neighboring chain C (magenta), on top of the SAM-bound SMYD2 structure (5ARG.pdb, gray). Note the overlap of the putative cofactor binding site with the residue K312 of AKMT, which is due to domain swap that causes the flip of the preceding  $\beta$ 1 from the antiparallel position (i.e. chain C) to a fully extended conformation in chain A. (B) 2Fo-Fc map (contoured at  $1.0 \sigma$ ) around the hinge of the swapped region. Note the unusual *cis*-conformation of the residue G311, which allows residue K312 (di-methylated) to loop out into the putative cofactor binding pocket defined partly by residue Y481.

**Figure S6. Other representative TPR-mediated homodimeric proteins.** (A) Crystal structure of the AKMT homodimer. The dimeric interface is formed by both the ASI motif and the TPR-like domain. (A) The N-N mediated dimer of the TPR domains of the *S. pombe* APC/C subunit Cut9. (B) The C-C mediated dimer of the TPR domains of the light chain of mammalian kinesin-1. (C) The M-M dimeric arrangement of the superhelical TPR domains of human O-linked GlcNAc transferase.

**Figure S7. Structural comparison of AKMT with SMYD3 analyzed by RAPIDO [4].** (A) Summary of structural alignments of AKMT with SMYD1-3 carried out by RAPIDO. The table shows values of rmsd and numbers of aligned residues, with each structure either as a single rigid body (rigid) or as multiple flexible rigid bodies (flex). (B) Details of the flexible alignment between AKMT and SMYD3 structures. Two local rigid bodies are identified by RAPIDO. Aligned structures based on the first (No. 1) and second (No. 2) rigid bodies are shown in (C-E) and (F-H), respectively. (C, F) Superposition of AKMT onto SMYD3 based on rigid body No. 1 (C) and No. 2 (F). (D, G) Extracted view of the aligned rigid bodies in (C, F). (E, H) Two orthogonal views of the ribbon diagrams of the aligned regions shown in (D, G).

## References:

1. Prilusky, J., et al., *FoldIndex: a simple tool to predict whether a given protein sequence is intrinsically unfolded*. Bioinformatics, 2005. **21**(16): p. 3435-8.
2. Laskowski, R.A., *Enhancing the functional annotation of PDB structures in PDBsum using key figures extracted from the literature*. Bioinformatics, 2007. **23**(14): p. 1824-7.
3. Krissinel, E. and K. Henrick, *Inference of macromolecular assemblies from crystalline state*. J Mol Biol, 2007. **372**(3): p. 774-97.

4. Mosca, R. and T.R. Schneider, *RAPIDO: a web server for the alignment of protein structures in the presence of conformational changes*. *Nucleic Acids Res*, 2008. **36**(Web Server issue): p. W42-6.

A

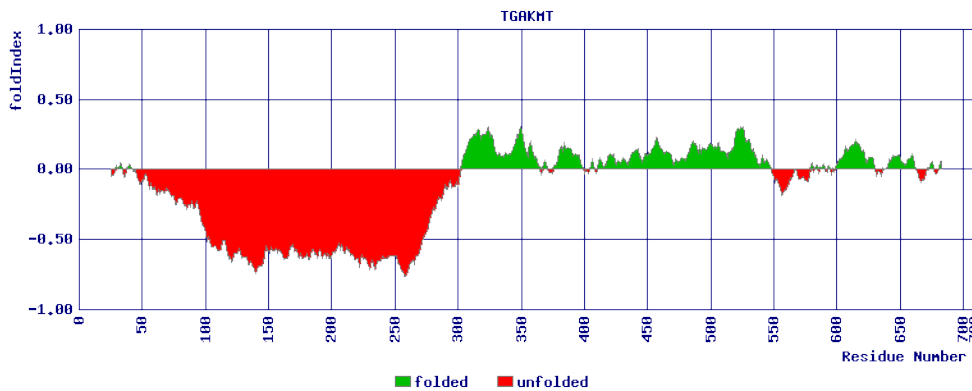

B

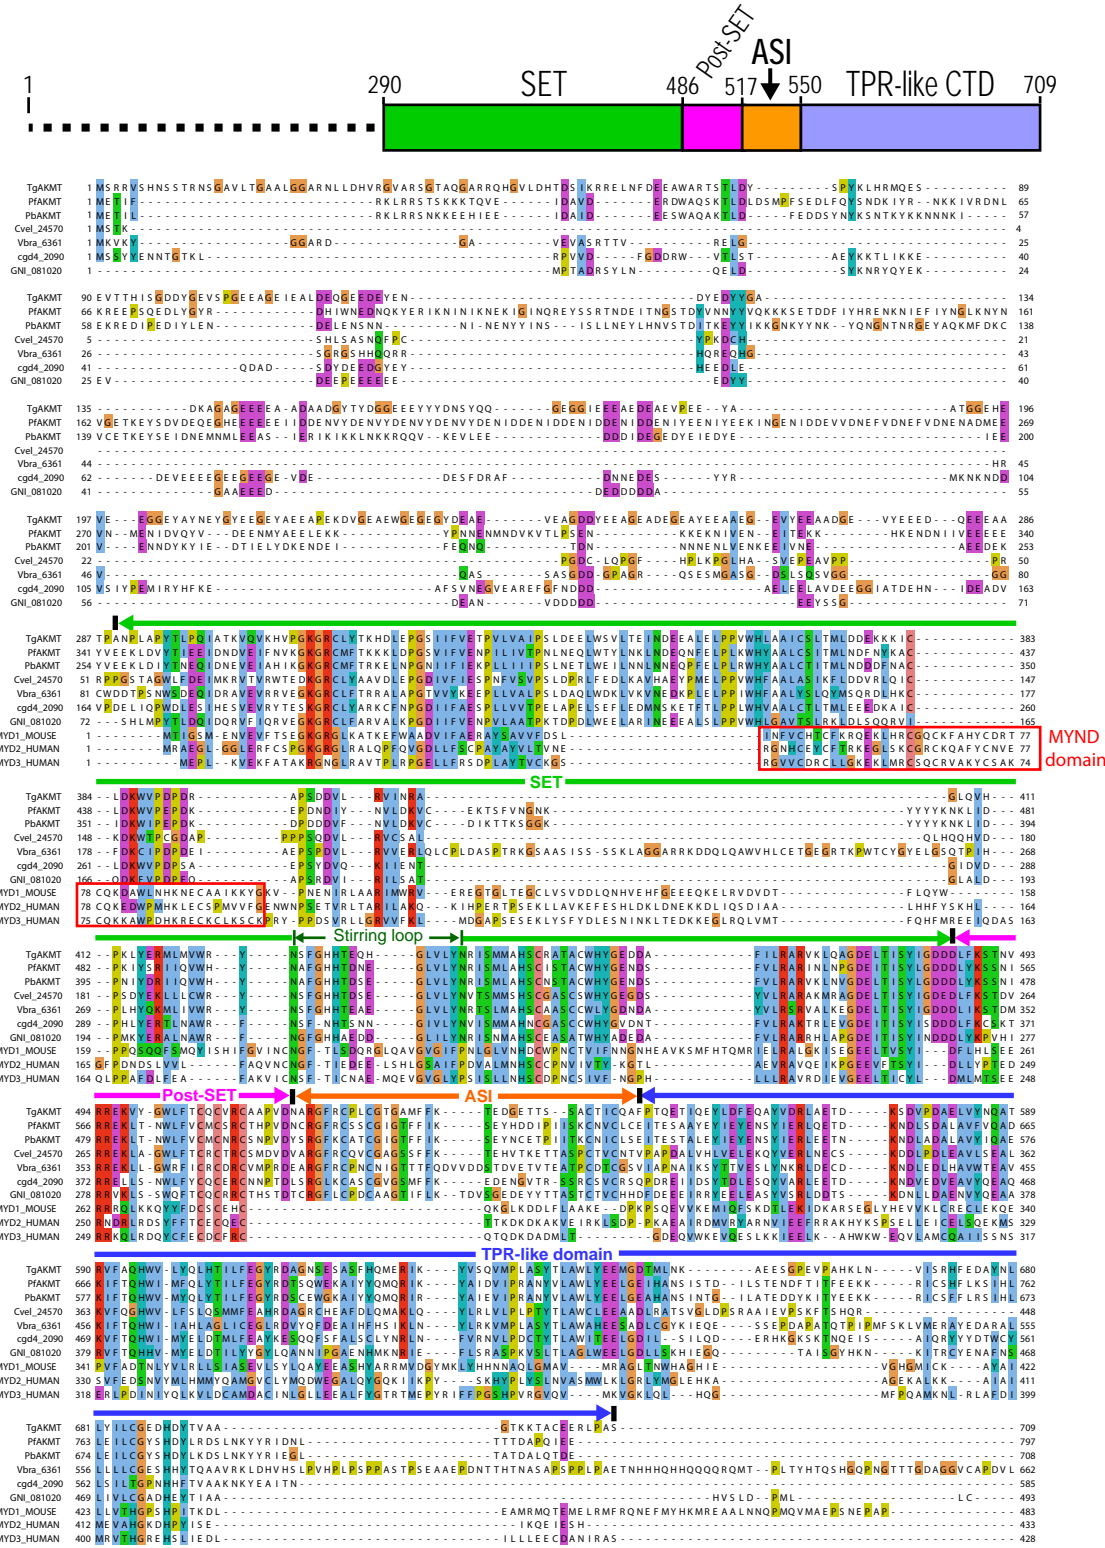

Fig S2

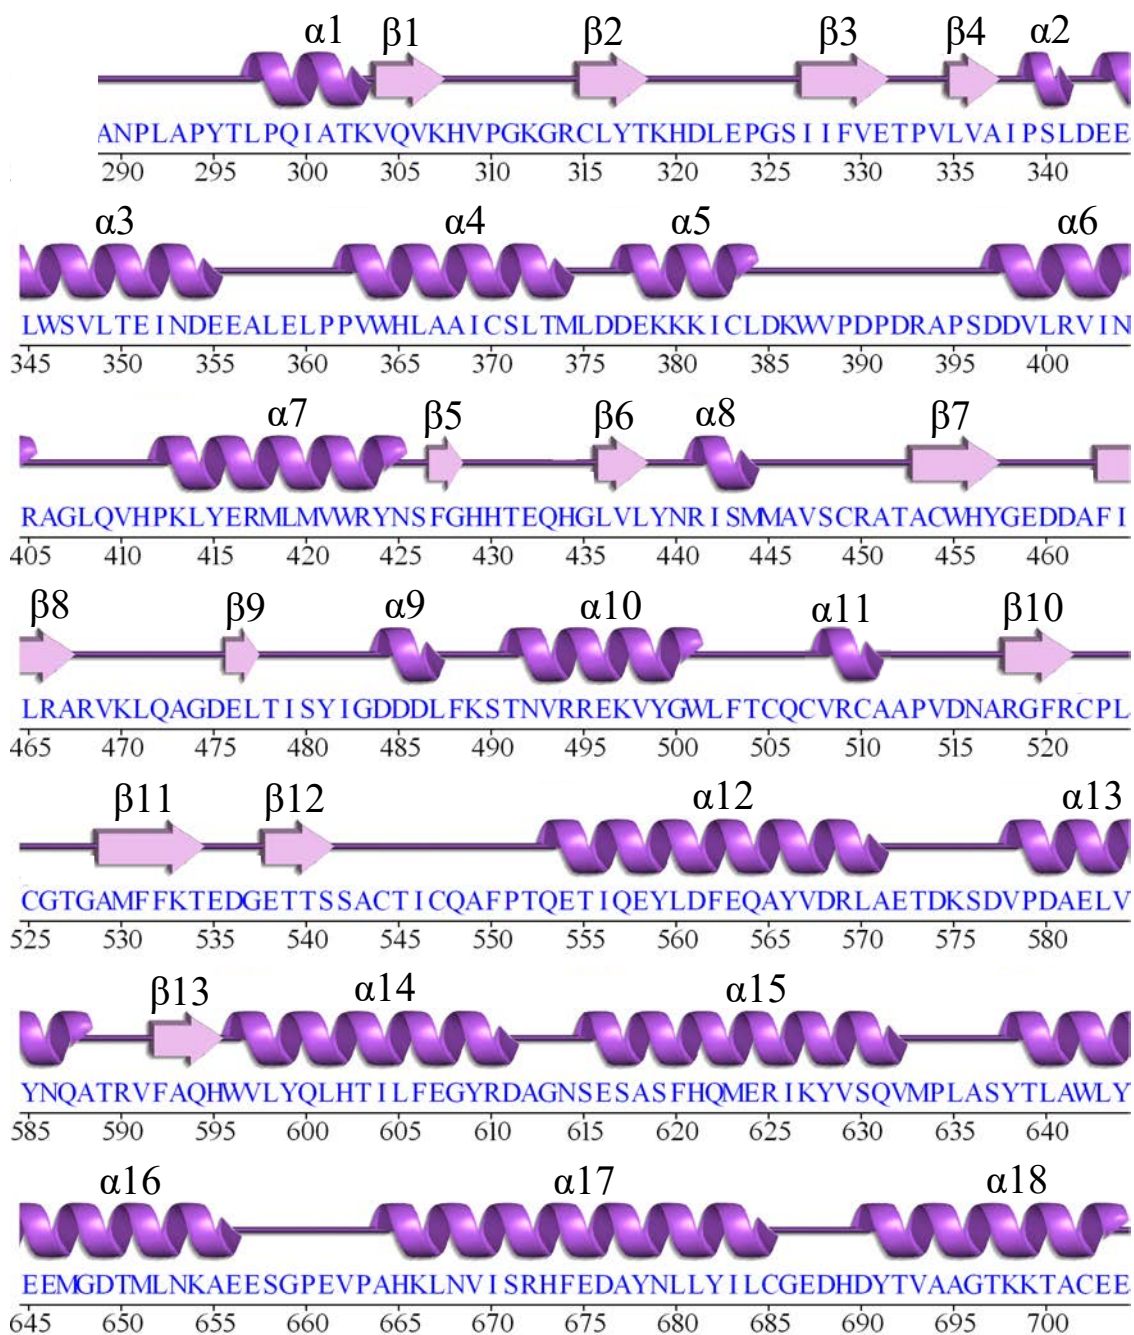

RLPAS  
 705

A

| Chain ID \ Residue # | A   | B    | C   | D   |
|----------------------|-----|------|-----|-----|
| → 303                | MLY | MLZ  | LYS | MLZ |
| 307                  | MLY | MLY  | LYS | MLY |
| → 312                | MLY | MLY  | MLY | MLY |
| 319                  | LYS | MLZ  | MLY | MLY |
| 379                  | LYS | MLZ* | LYS | MLY |
| 380                  | MLZ | LYS  | MLZ | MLZ |
| 381                  | LYS | LYS  | LYS | LYS |
| 386                  | LYS | LYS  | LYS | LYS |
| 413                  | LYS | MLY  | LYS | MLY |
| → 470                | MLZ | LYS  | MLY | MLY |
| → 489                | MLY | MLY  | MLY | MLY |
| 497                  | MLY | MLZ  | MLY | MLY |
| 533                  | LYS | MLZ  | LYS | MLZ |
| → 575                | LYS | MLZ  | MLY | LYS |
| 627                  | MLY | MLY  | MLY | MLY |
| 654                  | LYS | MLZ  | LYS | LYS |
| 666                  | MLY | MLZ  | MLY | MLZ |
| → 698                | LYS | LYS  | LYS | MLZ |
| → 699                | LYS | MLZ* | MLZ | LYS |

LYS: lysine; MLZ: mono-methyl lysine; MLY: di-methyl lysine. \* Two conformations

B

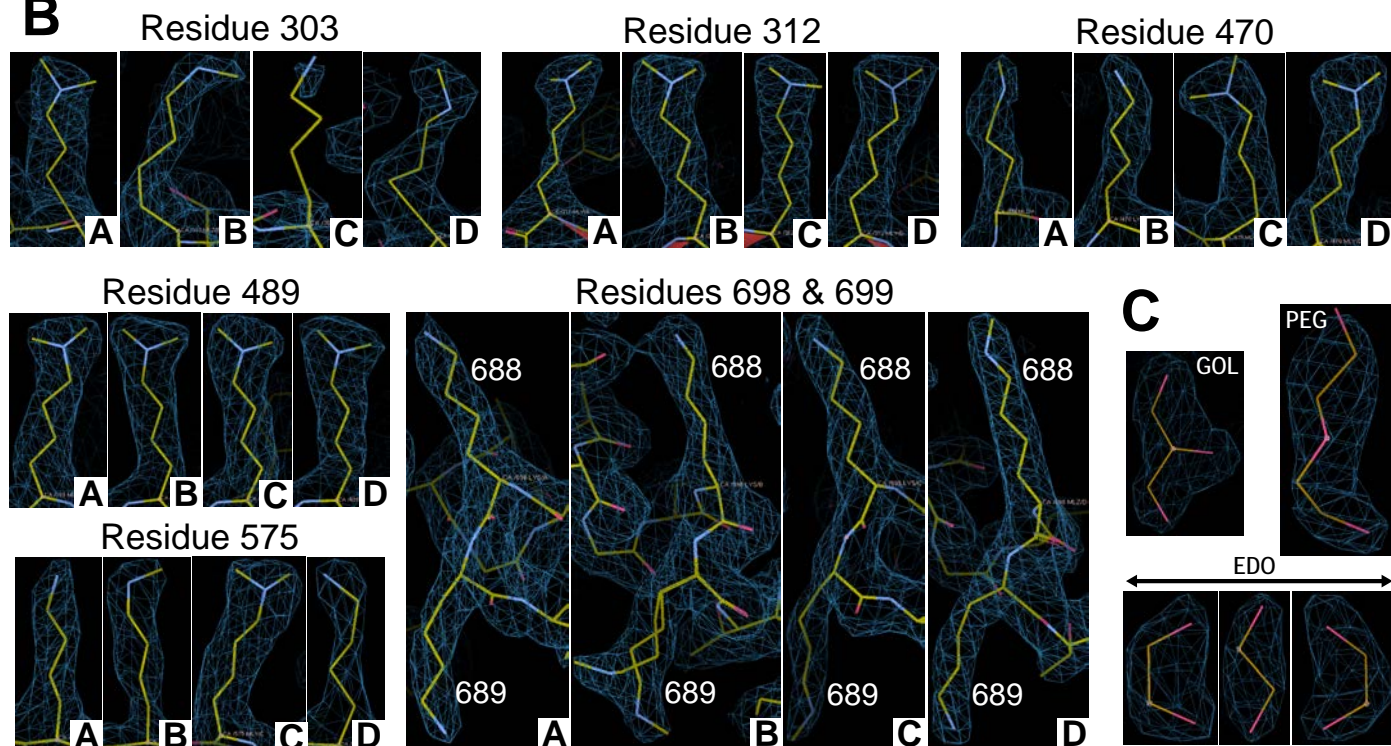

Fig S4

## Hydrogen bonds

| ## | Chain A   | Dist. [Å] | Chain B   |
|----|-----------|-----------|-----------|
| 1  | R672[NH2] | 3.34      | G526[O]   |
| 2  | N679[ND2] | 2.95      | T527[OG1] |
| 3  | K470[N]   | 2.84      | C547[O]   |
| 4  | R521[NH1] | 3.28      | D676[OD1] |
| 5  | T527[OG1] | 2.81      | D676[OD1] |
| 6  | G526[O]   | 3.29      | R672[NH2] |
| 7  | T527[OG1] | 3.18      | N679[ND2] |
| 8  | C547[O]   | 2.89      | K470[N]   |
| 9  | D676[OD1] | 2.93      | T527[OG1] |
| 10 | D676[OD1] | 3.19      | R521[NH1] |

## Salt bridges

| ## | Chain A   | Dist. [Å] | Chain B   |
|----|-----------|-----------|-----------|
| 1  | R521[NH1] | 3.28      | D676[OD1] |
| 2  | D676[OD1] | 3.19      | R521[NH1] |

## Hydrogen bonds

| ## | Chain C   | Dist. [Å] | Chain D   |
|----|-----------|-----------|-----------|
| 1  | R672[NH2] | 3.26      | G526[O]   |
| 2  | N679[ND2] | 2.97      | T527[OG1] |
| 3  | K470[N]   | 2.81      | C547[O]   |
| 4  | R521[NH1] | 3.32      | D676[OD1] |
| 5  | T527[OG1] | 2.77      | D676[OD1] |
| 6  | G526[O]   | 3.24      | R672[NH2] |
| 7  | T527[OG1] | 3.09      | N679[ND2] |
| 8  | C547[O]   | 2.83      | K470[N]   |
| 9  | D676[OD1] | 2.86      | T527[OG1] |
| 10 | D676[OD1] | 3.38      | R521[NH1] |

## Salt bridges

| ## | Chain C   | Dist. [Å] | Chain D   |
|----|-----------|-----------|-----------|
| 1  | R521[NH1] | 3.32      | D676[OD1] |
| 2  | D676[OD1] | 3.38      | R521[NH1] |

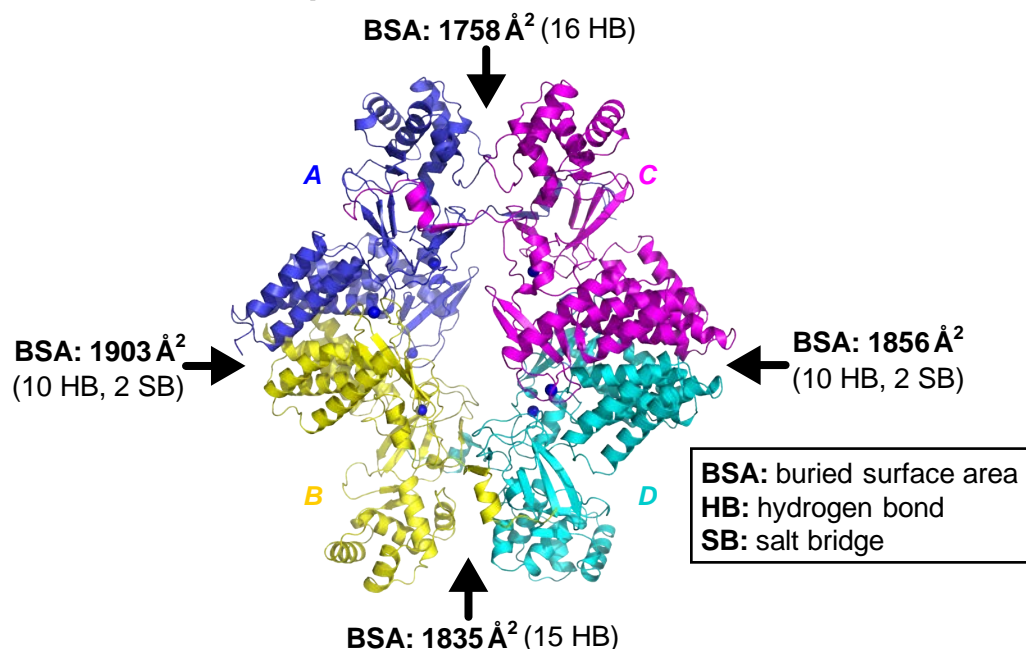

## Hydrogen bonds

| ## | Chain A   | Dist. [Å] | Chain C   |
|----|-----------|-----------|-----------|
| 1  | Y295[N]   | 2.72      | V330[O]   |
| 2  | Y295[OH]  | 3.71      | I328[O]   |
| 3  | L297[O]   | 3.37      | R441[NH1] |
| 4  | T302[O]   | 3.08      | H320[NE2] |
| 5  | K303[O]   | 2.88      | K319[N]   |
| 6  | Q305[N]   | 2.66      | Y317[O]   |
| 7  | Q305[O]   | 2.90      | Y317[N]   |
| 8  | K307[N]   | 3.02      | C315[O]   |
| 9  | K307[O]   | 3.59      | C315[N]   |
| 10 | C315[N]   | 3.72      | K307[O]   |
| 11 | C315[O]   | 3.13      | K307[N]   |
| 12 | Y317[N]   | 3.26      | Q305[O]   |
| 13 | Y317[O]   | 2.69      | Q305[N]   |
| 14 | K319[N]   | 3.08      | K303[O]   |
| 15 | H320[NE2] | 3.09      | T302[O]   |
| 16 | V330[O]   | 2.70      | Y295[OH]  |

## Hydrogen bonds

| ## | Chain B   | Dist. [Å] | Chain D  |
|----|-----------|-----------|----------|
| 1  | Y295[N]   | 2.94      | V330[O]  |
| 2  | K303[O]   | 2.86      | K319[N]  |
| 3  | Q305[N]   | 2.72      | Y317[O]  |
| 4  | Q305[O]   | 3.00      | Y317[N]  |
| 5  | K307[N]   | 2.92      | C315[O]  |
| 6  | K307[O]   | 3.73      | C315[N]  |
| 7  | K307[O]   | 3.24      | R314[NE] |
| 8  | C315[N]   | 3.66      | K307[O]  |
| 9  | C315[O]   | 3.00      | K307[N]  |
| 10 | Y317[N]   | 2.95      | Q305[O]  |
| 11 | Y317[O]   | 2.75      | Q305[N]  |
| 12 | K319[N]   | 2.79      | K303[O]  |
| 13 | K319[NZ]  | 2.98      | A301[O]  |
| 14 | H320[NE2] | 3.37      | T302[O]  |
| 15 | V330[O]   | 2.85      | Y295[N]  |

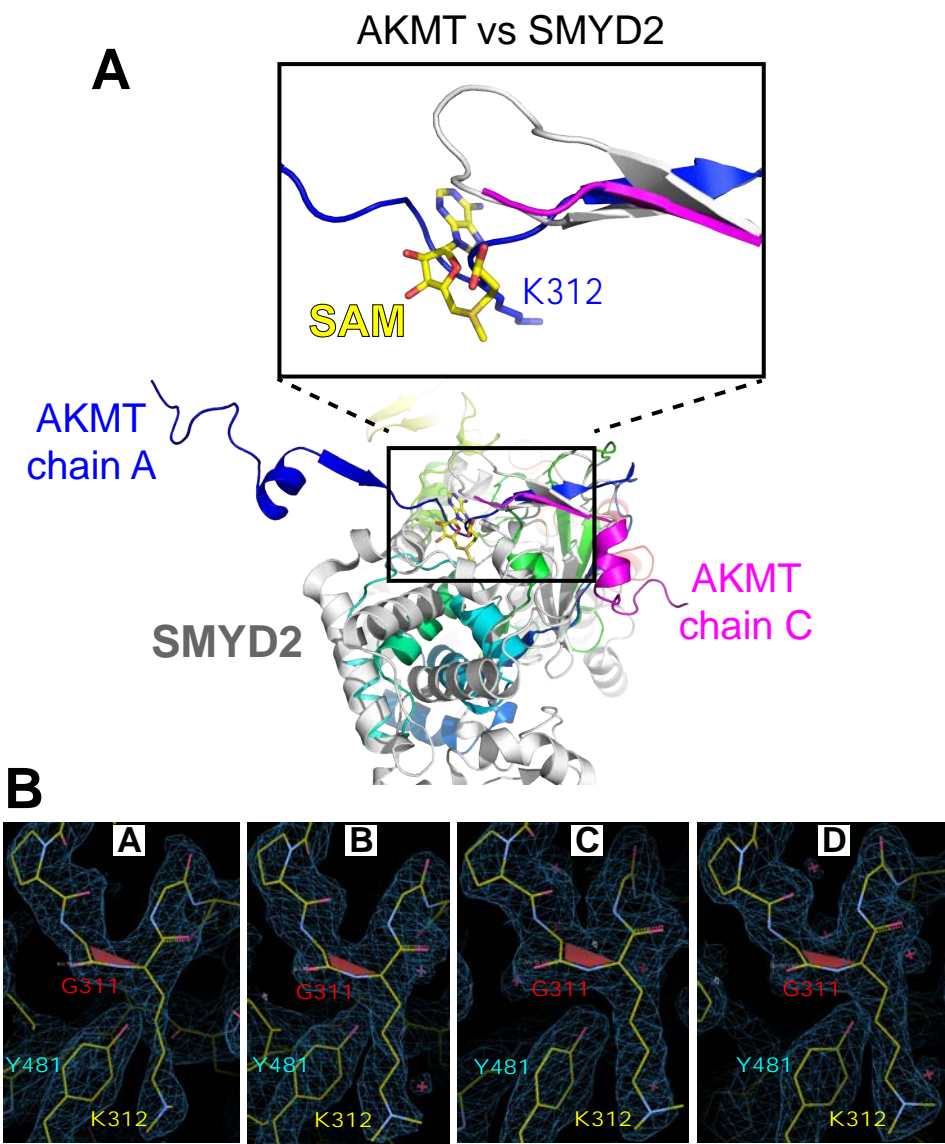



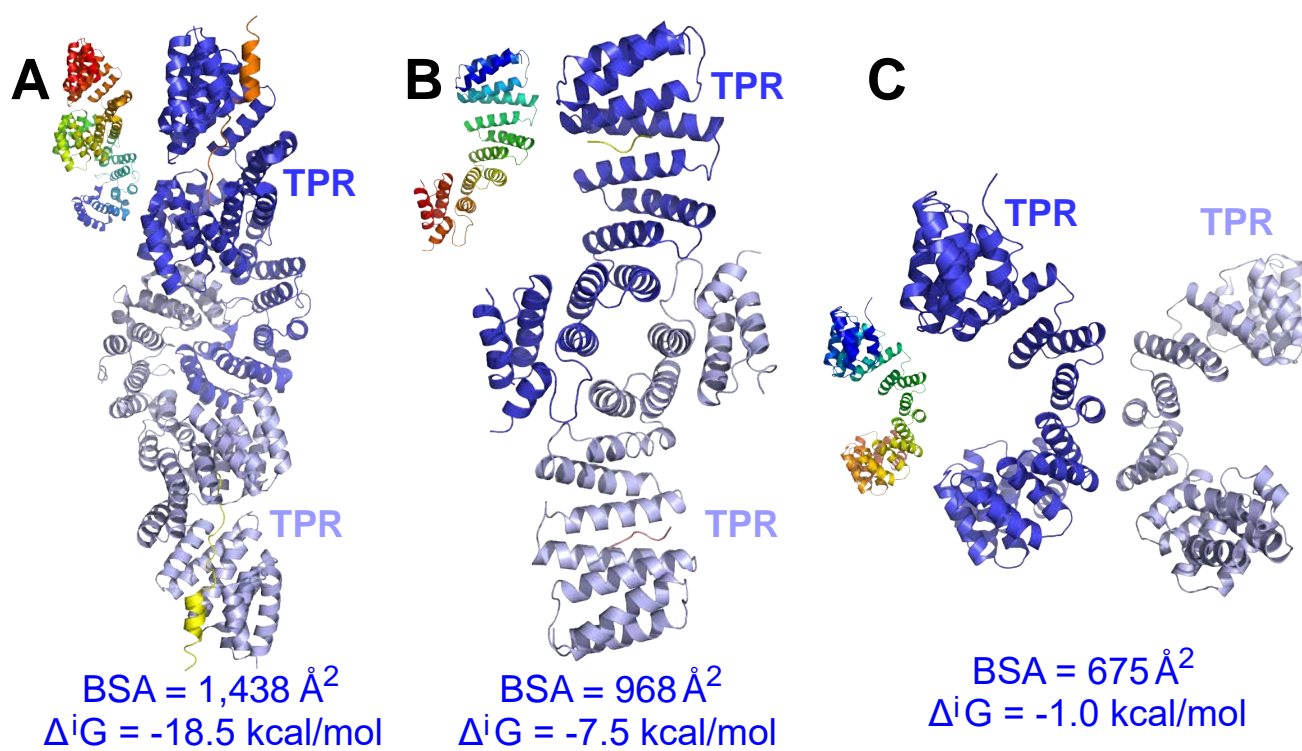

**A** Statistics of structural alignments of AKMT with SMYD 1-3 by RAPIDO

| AKMT vs.         | RMSD <sub>rigid</sub> | #aa aligned | RMSD <sub>flex</sub> (Å) | # aa rigid | # rigid bodies |
|------------------|-----------------------|-------------|--------------------------|------------|----------------|
| SMYD1 (3N71.pdb) | 3.16                  | 325         | <b>1.34</b>              | 223        | 2              |
| SMYD2 (5ARG.pdb) | 3.90                  | 317         | <b>1.08</b>              | 228        | 2              |
| SMYD3 (5EX0.pdb) | 4.14                  | 308         | <b>1.20</b>              | 190        | 2              |

**B** AKMT vs SMYD3 (rigid body-based structural alignments)

| Rigid bodies | # aa aligned | RMSD (Å) | Description      |                                                                                                                              |
|--------------|--------------|----------|------------------|------------------------------------------------------------------------------------------------------------------------------|
| No. 1        | 129          | 1.18     | AKMT             | A304-A307, A314-A336, A386-A388, A414-A427, A437-A457, A462-A482, A490-A510, A636-A637, A671-A672, A675-A687, A702-A706      |
|              |              |          | SMYD3 (5EX0.pdb) | A6-A9, A16-A38, A129-A131, A170-A183, A196-A216, A220-A240, A245-A254, A256-A266, A365-A366, A390-A391, A394-A406, A421-A425 |
| No. 2        | 61           | 1.22     | AKMT             | A515-A520, A595-A630, A640-A652, A673-A674, A698-A701                                                                        |
|              |              |          | SMYD3 (5EX0.pdb) | A273-A278, A324-A359, A369-A381, A392-A393, A417-A420                                                                        |

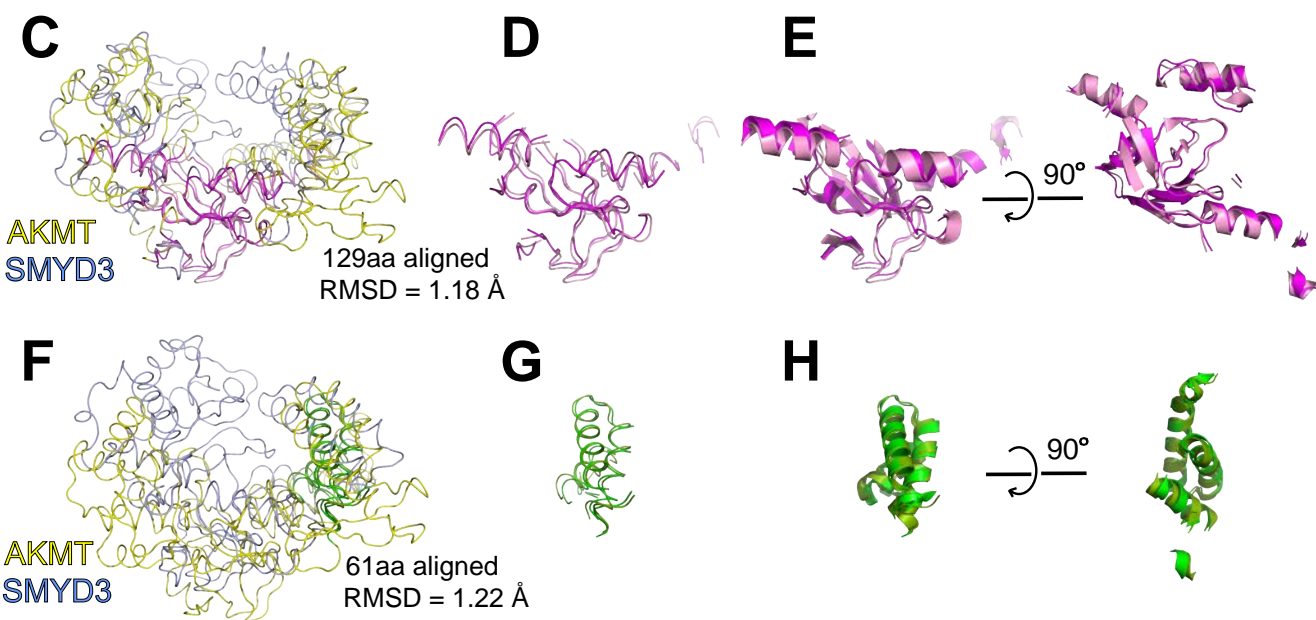

Supplement: Supplementary file [file 264291-1.pdf]
